# Supplementary material for: Alcohol Use of German Adults during Different Pandemic Phases: Repeated Cross-Sectional Analyses in the COVID-19 Snapshot Monitoring Study (COSMO)
Source: MDPI journal article supplement (doi:10.3390/ijerph19095489), 2022-05-01
Supplement: s1 [file s1]

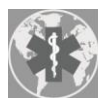

## Modification of Alcohol Consumption Frequency

**Supplementary Table S1.** Univariate analysis for modification of AUF (last four weeks vs. last 12 months) between different pandemic phases: ORs and 95% CIs.

| Characteristics | Wave 15 vs. 7 |             | Wave 34 vs. 7 |                        | Wave 34 vs.15 |                      |
|-----------------|---------------|-------------|---------------|------------------------|---------------|----------------------|
|                 | OR            | 95 % CI     | OR            | 95 % CI                | OR            | 95 % CI              |
| Reduced AUF     | 0.84          | [0.60–1.17] | 0.93          | [0.67–1.28]            | 1.10          | [0.78–1.55]          |
| Unmodified AUF  | 1.22          | [0.98–1.52] | <b>1.41</b>   | <b>[1.12–1.76] **</b>  | 1.16          | [0.91–1.46]          |
| Increased AUF   | 0.84          | [0.64–1.09] | <b>0.62</b>   | <b>[0.47–0.82] ***</b> | <b>0.74</b>   | <b>[0.55–0.99] *</b> |

\*  $p < 0.05$ ; \*\*  $p < 0.01$ ; \*\*\*  $p < 0.001$ ; marked in bold. Abbreviations: AUF: alcohol consumption frequency, OR: odds ratio, CI: confidence interval.

## Pre-pandemic to Pandemic Comparison of Non-Drinkers

**Supplementary Table S2.** Comparison of relative proportions of non-drinkers during the pandemic (AUF in the last four weeks: category “never”) to pre-pandemic data (GEDA 14/15) [26].

| Characteristics       | GEDA 14/15 | Wave 7<br>(14/15 April 2020) |      | Wave 15<br>(23/24 June 2020) |      | Wave 34<br>(26/27 January 2021) |      |
|-----------------------|------------|------------------------------|------|------------------------------|------|---------------------------------|------|
|                       |            | <i>n</i>                     | %    | <i>n</i>                     | %    | <i>n</i>                        | %    |
| Men (total)           | 10.3       | 64                           | 12.7 | 65                           | 13.5 | 68                              | 13.5 |
| 18–29                 | 10.5       | 13                           | 13.4 | 13                           | 15.7 | 8                               | 8.2  |
| 30–44                 | 9.4        | 14                           | 11.3 | 13                           | 8.7  | 15                              | 9.6  |
| 45–64                 | 10.0       | 27                           | 14.4 | 28                           | 15.7 | 34                              | 19.1 |
| ≥65                   | 11.8       | 10                           | 10.5 | 11                           | 15.1 | 11                              | 15.2 |
| Women (total)         | 16.9       | 111                          | 21.0 | 112                          | 22.0 | 96                              | 19.3 |
| 18–29                 | 15.0       | 22                           | 20.0 | 22                           | 23.2 | 21                              | 22.1 |
| 30–44                 | 16.5       | 30                           | 17.4 | 30                           | 18.8 | 38                              | 24.4 |
| 45–64                 | 12.5       | 39                           | 23.8 | 40                           | 23.3 | 28                              | 15.5 |
| ≥65                   | 24.3       | 20                           | 24.1 | 20                           | 24.1 | 9                               | 13.8 |
| Total (men and women) | 13.7       | 175                          | 17.0 | 177                          | 17.8 | 164                             | 16.4 |

## Univariate Analysis—Pandemic-Related Variables

**Supplementary Table S3.** Univariate analysis for pandemic-related variables: relative frequencies, ORs, and 95% CIs of individuals with increased AUF compared to those with reduced/unmodified AUF between different subgroups.

| Characteristics                                       | Wave 7<br>(14/15 April 2020) |             |                      | Wave 15<br>(23/24 June 2020) |             |                        | Wave 34<br>(26/27 January 2021) |      |             |
|-------------------------------------------------------|------------------------------|-------------|----------------------|------------------------------|-------------|------------------------|---------------------------------|------|-------------|
|                                                       | Increased AUF (%)            | OR          | 95% CI               | Increased AUF (%)            | OR          | 95% CI                 | Increased AUF (%)               | OR   | 95% CI      |
| Perceived burden                                      |                              |             |                      |                              |             |                        |                                 |      |             |
| No (reference)                                        | 11.0                         |             |                      | 9.2                          |             |                        | 7.2                             |      |             |
| Yes                                                   | 16.4                         | <b>1.59</b> | <b>[1.11–2.28] *</b> | 15.0                         | <b>1.73</b> | <b>[1.16–2.57] **</b>  | 9.6                             | 1.37 | [0.86–2.16] |
| Enhanced frequency of information                     |                              |             |                      |                              |             |                        |                                 |      |             |
| No                                                    | 11.7                         |             |                      | 11.1                         |             |                        | 7.1                             |      |             |
| Yes                                                   | 13.6                         | 1.19        | [0.77–1.84]          | 11.4                         | 1.03        | [0.69–1.55]            | 9.1                             | 1.32 | [0.76–2.28] |
| High levels of frustration due to protective measures |                              |             |                      |                              |             |                        |                                 |      |             |
| No (reference)                                        | 11.6                         |             |                      | 8.8                          |             |                        | 7.6                             |      |             |
| Yes                                                   | 17.4                         | <b>1.61</b> | <b>[1.10–2.36] *</b> | 17.3                         | <b>2.17</b> | <b>[1.45–3.24] ***</b> | 9.9                             | 1.35 | [0.86–2.10] |
| Perceived helplessness regarding SARS-CoV-2           |                              |             |                      |                              |             |                        |                                 |      |             |
| No (reference)                                        | 11.3                         |             |                      | 11.1                         |             |                        | 7.9                             |      |             |
| Yes                                                   | 16.1                         | <b>1.51</b> | <b>[1.05–2.16] *</b> | 11.7                         | 1.06        | [0.70–1.62]            | 9.6                             | 1.23 | [0.79–1.91] |
| High levels of rumination about SARS-CoV-2            |                              |             |                      |                              |             |                        |                                 |      |             |
| No (reference)                                        | 11.1                         |             |                      | 10.3                         |             |                        | 8.7                             |      |             |
| Yes                                                   | 16.1                         | <b>1.51</b> | <b>[1.05–2.17] *</b> | 13.8                         | 1.39        | [0.91–2.11]            | 8.4                             | 0.97 | [0.62–1.50] |

|                                                |      |             |                      |      |      |             |      |      |             |
|------------------------------------------------|------|-------------|----------------------|------|------|-------------|------|------|-------------|
| <b>High levels of worries...</b>               |      |             |                      |      |      |             |      |      |             |
| ... about widening gap between rich and poor   |      |             |                      |      |      |             |      |      |             |
| No (reference)                                 | 14.2 |             |                      | 10.1 |      |             | 8.7  |      |             |
| Yes                                            | 12.6 | 0.87        | [0.60–1.26]          | 11.9 | 1.19 | [0.78–1.82] | 8.5  | 0.98 | [0.59–1.62] |
| ... to lose employment                         |      |             |                      |      |      |             |      |      |             |
| No (reference)                                 | 11.8 |             |                      | 11.0 |      |             | 8.1  |      |             |
| Yes                                            | 17.2 | <b>1.56</b> | <b>[1.03–2.34] *</b> | 13.8 | 1.29 | [0.82–2.03] | 8.4  | 1.04 | [0.62–1.73] |
| ... to get ill                                 |      |             |                      |      |      |             |      |      |             |
| No (reference)                                 | NA   | NA          | NA                   | 11.8 |      |             | 10.0 |      |             |
| Yes                                            | NA   | NA          | NA                   | 10.1 | 0.84 | [0.55–1.30] | 7.1  | 0.68 | [0.44–1.07] |
| ... about longtime restrictions of social life |      |             |                      |      |      |             |      |      |             |
| No (reference)                                 | NA   | NA          | NA                   | 10.0 |      |             | 6.9  |      |             |
| Yes                                            | NA   | NA          | NA                   | 12.5 | 1.29 | [0.87–1.93] | 9.3  | 1.37 | [0.81–2.30] |

To view the *n* of the subgroups, refer to Table 1. \*  $p < 0.05$ ; \*\*  $p < 0.01$ , \*\*\*  $p < 0.001$ ; marked in bold. Abbreviations: AUF: alcohol consumption frequency, OR: odds ratio, CI: confidence interval, NA: not available (not collected in this wave). Non respondents for high levels of worries to lose employment were not included in the analysis.

### Additional Analysis—Exceeding DHS Recommendation

**SupplementaryTable S4.** Univariate analysis: relative frequencies, ORs, and 95% CIs of individuals exceeding (AU on  $\geq 5$  days/week) compared with those who adhere to the DHS recommendation (AU on  $< 5$  days/week).

| Characteristics              | Wave 7<br>(14/15 April 2020)       |             |                        | Wave 15<br>(23/24 June 2020)       |             |                        | Wave 34<br>(26/27 January 2021)    |             |                        |
|------------------------------|------------------------------------|-------------|------------------------|------------------------------------|-------------|------------------------|------------------------------------|-------------|------------------------|
|                              | AU on $\geq 5$<br>days/week<br>(%) | OR          | 95% CI                 | AU on $\geq 5$<br>days/week<br>(%) | OR          | 95% CI                 | AU on $\geq 5$<br>days/week<br>(%) | OR          | 95% CI                 |
| Gender                       |                                    |             |                        |                                    |             |                        |                                    |             |                        |
| Male (reference)             | 15.9                               |             |                        | 11.6                               |             |                        | 11.7                               |             |                        |
| Female                       | 6.6                                | <b>0.37</b> | <b>[0.25–0.57] ***</b> | 4.3                                | <b>0.34</b> | <b>[0.21–0.57] ***</b> | 4.6                                | 0.37        | <b>[0.22–0.60] ***</b> |
| Age (continuous)             |                                    | <b>1.03</b> | <b>[1.02–1.04] ***</b> |                                    | <b>1.03</b> | <b>[1.01–1.05] ***</b> |                                    | 1.03        | <b>[1.01–1.04] ***</b> |
| Age group                    |                                    |             |                        |                                    |             |                        |                                    |             |                        |
| $\geq 65$ (reference)        | 15.7                               |             |                        | 14.1                               |             |                        | 13.1                               |             |                        |
| 18–29                        | 6.3                                | <b>0.36</b> | <b>[0.18–0.72] **</b>  | 3.4                                | <b>0.21</b> | <b>[0.08–0.54] **</b>  | 4.2                                | <b>0.29</b> | <b>[0.12–0.68] **</b>  |
| 30–44                        | 7.4                                | <b>0.43</b> | <b>[0.24–0.78] **</b>  | 5.2                                | <b>0.33</b> | <b>[0.17–0.65] **</b>  | 7.3                                | 0.52        | [0.27–1.01]            |
| 45–64                        | 14.8                               | 0.93        | [0.57–1.54]            | 9.7                                | 0.66        | [0.37–1.16]            | 9.2                                | 0.67        | [0.36–1.23]            |
| Educational level            |                                    |             |                        |                                    |             |                        |                                    |             |                        |
| No A-Level (reference)       | 10.6                               |             |                        | 8.6                                |             |                        | 9.1                                |             |                        |
| A-Level                      | 11.6                               | 1.10        | [0.75–1.64]            | 7.2                                | 0.82        | [0.52–1.31]            | 7.5                                | 0.81        | [0.51–1.27]            |
| Migration background         |                                    |             |                        |                                    |             |                        |                                    |             |                        |
| No/Don't know (reference)    | 11.7                               |             |                        | 7.8                                |             |                        | 8.8                                |             |                        |
| Yes                          | 7.5                                | 0.61        | [0.31–1.21]            | 8.0                                | 1.02        | [0.51–1.94]            | 5.3                                | 0.58        | [0.29–1.15]            |
| Local region                 |                                    |             |                        |                                    |             |                        |                                    |             |                        |
| East                         | 8.9                                |             |                        | 8.5                                |             |                        | 9.3                                |             |                        |
| West                         | 11.6                               | 1.34        | [0.76–2.36]            | 7.7                                | 0.9         | [0.49–1.65]            | 8.0                                | 0.84        | [0.47–1.52]            |
| Relationship status          |                                    |             |                        |                                    |             |                        |                                    |             |                        |
| No (reference)               | 10.1                               |             |                        | 6.9                                |             |                        | 5.2                                |             |                        |
| Yes                          | 11.6                               | 1.16        | [0.76–1.79]            | 8.3                                | 1.21        | [0.73–2.02]            | 9.5                                | <b>1.93</b> | <b>[1.10–3.39] *</b>   |
| Children                     |                                    |             |                        |                                    |             |                        |                                    |             |                        |
| No (reference)               | 11.2                               |             |                        | 8.5                                |             |                        | 8.8                                |             |                        |
| Yes                          | 11.1                               | 0.99        | [0.65–1.51]            | 6.4                                | 0.75        | [0.44–1.27]            | 6.7                                | 0.74        | [0.43–1.26]            |
| Household size               |                                    |             |                        |                                    |             |                        |                                    |             |                        |
| Just me (reference)          | 12.3                               |             |                        | 8.4                                |             |                        | 5.6                                |             |                        |
| 2 people                     | 12.2                               | 0.996       | [0.62–1.61]            | 9.6                                | 1.15        | [0.66–2.00]            | 11.1                               | <b>2.10</b> | <b>[1.11–3.99] *</b>   |
| $\geq 3$ people              | 9.0                                | 0.77        | [0.45–1.32]            | 5.5                                | 0.64        | [0.34–1.20]            | 6.3                                | 1.13        | [0.54–2.33]            |
| Local region                 |                                    |             |                        |                                    |             |                        |                                    |             |                        |
| East                         |                                    |             |                        |                                    |             |                        | 9.3                                |             |                        |
| West                         |                                    |             |                        |                                    |             |                        | 8.0                                |             |                        |
| Household net income         |                                    |             |                        |                                    |             |                        |                                    |             |                        |
| $< \text{€}1250$ (reference) | NA                                 | NA          | NA                     | 7.0                                |             |                        | 3.5                                |             |                        |

|                                                       |      |             |                      |      |      |             |      |             |                      |
|-------------------------------------------------------|------|-------------|----------------------|------|------|-------------|------|-------------|----------------------|
| € 1250–2249                                           | NA   | NA          | NA                   | 7.2  | 1.03 | [0.46–2.29] | 8.2  | 2.47        | [0.82–7.39]          |
| € 2250–3999                                           | NA   | NA          | NA                   | 9.1  | 1.32 | [0.63–2.76] | 9.3  | 2.83        | [0.98–8.16]          |
| >€4000                                                | NA   | NA          | NA                   | 8.2  | 1.18 | [0.51–2.75] | 10.6 | <b>3.27</b> | <b>[1.10–9.79] *</b> |
| No specification                                      | NA   | NA          | NA                   | 5.0  | 0.69 | [0.21–2.29] | 4.0  | 1.16        | [0.25–5.32]          |
| Employment                                            |      |             |                      |      |      |             |      |             |                      |
| No (reference)                                        | NA   | NA          | NA                   | 9.0  |      |             | 9.1  |             |                      |
| Yes                                                   | NA   | NA          | NA                   | 7.3  | 0.8  | [0.49–1.28] | 7.8  | 0.85        | [0.53–1.37]          |
| Chronic disease                                       |      |             |                      |      |      |             |      |             |                      |
| No/Don't know (reference)                             | 10.5 |             |                      | 6.9  |      |             | 7.8  |             |                      |
| Yes                                                   | 12.5 | 1.22        | [0.81–1.82]          | 9.8  | 1.47 | [0.92–2.35] | 9.0  | 1.18        | [0.74–1.89]          |
| Physical activity                                     |      |             |                      |      |      |             |      |             |                      |
| <2.5 hours/week (reference)                           | 11.1 |             |                      | 7.5  |      |             | NA   | NA          | NA                   |
| ≥2.5 hours/week                                       | 11.2 | 1.00        | [0.68–1.48]          | 8.5  | 1.15 | [0.71–1.84] | NA   | NA          | NA                   |
| Perceived burden                                      |      |             |                      |      |      |             |      |             |                      |
| No (reference)                                        | 9.2  |             |                      | 7.4  |      |             | 8.4  |             |                      |
| Yes                                                   | 14.0 | <b>1.60</b> | <b>[1.09–2.37] *</b> | 8.5  | 1.21 | [0.75–1.94] | 8.0  | 0.95        | [0.61–1.51]          |
| Enhanced frequency of information                     |      |             |                      |      |      |             |      |             |                      |
| No (reference)                                        | 6.5  |             |                      | 9.3  |      |             | 8.7  |             |                      |
| Yes                                                   | 12.6 | <b>2.08</b> | <b>[1.20–3.61] *</b> | 6.9  | 0.72 | [0.45–1.14] | 8.0  | 0.91        | [0.54–1.54]          |
| High levels of frustration due to protective measures |      |             |                      |      |      |             |      |             |                      |
| No                                                    | 6.5  |             |                      | 7.0  |      |             | 8.3  |             |                      |
| Yes                                                   | 12.6 | 1.50        | [0.99–2.26]          | 10.0 | 1.49 | [0.92–2.41] | 8.1  | 0.97        | [0.62–1.54]          |
| Perceived helplessness regarding SARS-CoV-2           |      |             |                      |      |      |             |      |             |                      |
| No                                                    | 10   |             |                      | 8.6  |      |             | 8.6  |             |                      |
| Yes                                                   | 14.2 | 0.97        | [0.65–1.44]          | 6.3  | 0.72 | [0.43–1.22] | 7.6  | 0.87        | [0.54–1.39]          |
| High levels of rumination about SARS-CoV-2            |      |             |                      |      |      |             |      |             |                      |
| No                                                    | 11.3 |             |                      | 7.9  |      |             | 8.7  |             |                      |
| Yes                                                   | 10.9 | 1.13        | [0.77–1.67]          | 7.6  | 0.95 | [0.57–1.61] | 7.6  | 0.86        | [0.54–1.35]          |
| <b>High levels of worries...</b>                      |      |             |                      |      |      |             |      |             |                      |
| ... about widening gap between rich and poor          |      |             |                      |      |      |             |      |             |                      |
| No                                                    | 10.6 |             |                      | 6.3  |      |             | 9.1  |             |                      |
| Yes                                                   | 11.9 | 1.22        | [0.81–1.84]          | 8.7  | 1.42 | [0.84–2.38] | 7.9  | 0.85        | [0.51–1.41]          |
| ... to get ill                                        |      |             |                      |      |      |             |      |             |                      |
| No                                                    | NA   | NA          | NA                   | 7.4  |      |             | 9.4  |             |                      |
| Yes                                                   | NA   | NA          | NA                   | 8.9  | 1.22 | [0.75–1.98] | 6.9  | 0.71        | [0.45–1.12]          |
| ... about longtime restrictions of social life        |      |             |                      |      |      |             |      |             |                      |
| No                                                    | NA   | NA          | NA                   | 7.5  |      |             | 8.7  |             |                      |
| Yes                                                   | NA   | NA          | NA                   | 8.2  | 1.11 | [0.70–1.76] | 8.0  | 0.91        | [0.56–1.49]          |
| ... to lose employment                                |      |             |                      |      |      |             |      |             |                      |
| No                                                    | 9.9  |             |                      | 8.0  |      |             | 9.2  |             |                      |
| Yes                                                   | 11.8 | 1.03        | [0.65–1.65]          | 6.9  | 0.85 | [0.47–1.54] | 5.5  | 0.57        | [0.32–1.03]          |

\*  $p < 0.05$ ; \*\*  $p < 0.01$ , \*\*\*  $p < 0.001$ ; marked in bold. Abbreviations: AU: alcohol use, DHS: German Head Office for Addiction Issues, OR: odds ratio, CI: confidence interval.
